# Supplementary material for: Central nervous system remyelination in culture — A tool for multiple sclerosis research
Source: PubMed Central journal article supplement (PMC3117145; doi:10.1016/j.expneurol.2011.04.009), 2011-07

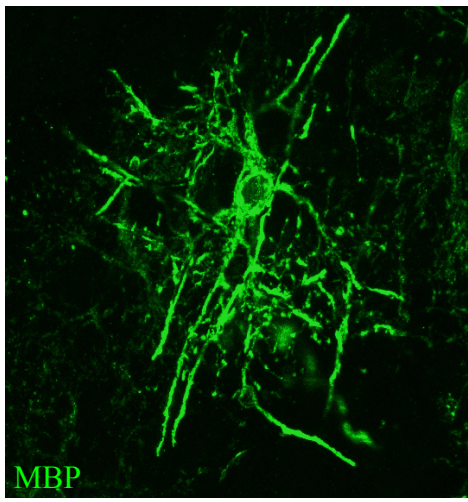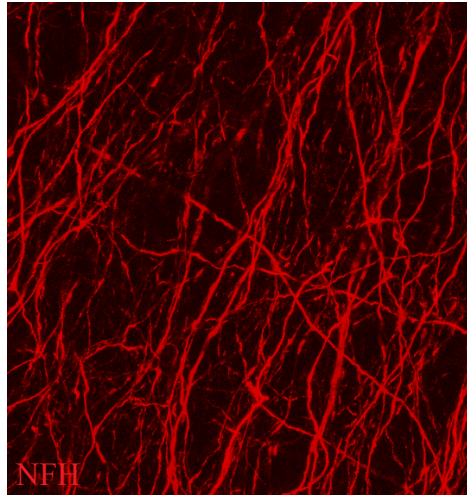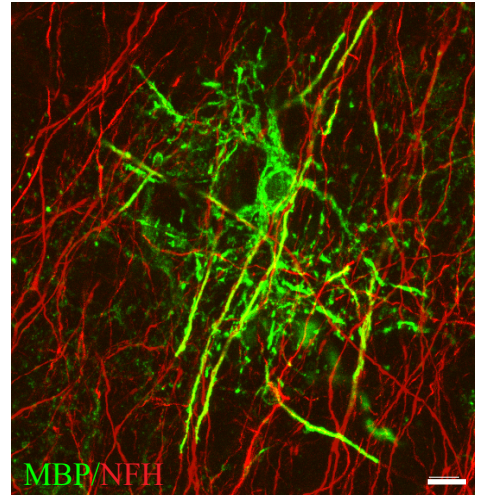

Supplement: mmc1.pdf [file mmc1.pdf]
